# Supplementary material for: Hydroxylation of TiO2-B: insights from density functional calculations
Source: Royal Society of Chemistry journal article supplement (doi:10.1039/c0jm00422g), 2010-01-01
Supplement: c0jm00422g.pdf [file c0jm00422g.pdf]

Short explanation of the files

file s001-I\_2-D1.xtl

content: Atomic positions of the I:2-D1 configuration of Fig. 2.  
(fractional coordinates, XTL format)

file S001-I\_2-M1.xtl

content: Atomic positions of the I:2-M1 configuration of Fig. 2.  
(fractional coordinates, XTL format)

file s001-I\_4-M.xtl

content: Atomic positions of the I:4-M configuration of Fig. 2.  
(fractional coordinates, XTL format)

file s001-II\_2-D.xtl

content: Atomic positions of the II:2-D configuration of Fig. 2.  
(fractional coordinates, XTL format)

file s100\_1-Da.xtl

content: Atomic positions of the 1:Da configuration of Fig. 4.  
(fractional coordinates, XTL format)

file s010\_2-D1.xtl

content: Atomic positions of the 2-D1 configuration of Fig. 6.  
(fractional coordinates, XTL format)

file s010\_4-X.xtl

content: Atomic positions of the 4-X configuration of Fig. 6.  
(fractional coordinates, XTL format)

file s110\_1-D1a.xtl

content: Atomic positions of the 1-D1a configuration of Fig. 8.  
(fractional coordinates, XTL format)

file s110\_2-X.xtl

content: Atomic positions of the 2-X configuration of Fig. 8.  
(fractional coordinates, XTL format)

file s-601\_4-X1.xtl

content: Atomic positions of the 4-X1 configuration of Fig. 10.  
(fractional coordinates, XTL format)
