# Supplementary material for: Hydroxylation of TiO2-B: insights from density functional calculations
Source: Royal Society of Chemistry journal article supplement (doi:10.1039/c0jm00422g), 2010-01-01
Supplement: s-601_4-x1.xtl [file s-601_4-x1.xtl]

DIMENSION 3
CELL s-601 4-X1
3.754600  19.102000  30.000000  90.000000  90.000000  84.332500
SYMMETRY  NUMBER 1  LABEL P1

ATOMS
NAME       X          Y          Z
O       0.25885    0.99957    0.23730
O       0.06189    0.42063    0.25195
Ti      0.21690    0.08633    0.25904  
Ti      0.30627    0.90104    0.26389  
O       0.16299    0.19647    0.25037
O       0.35284    0.80722    0.25790
O       0.50154    0.52851    0.26193
O       0.70788    0.10464    0.26596
Ti      0.51172    0.42580    0.26739  
Ti      0.65039    0.22592    0.26934  
O       0.80065    0.91265    0.27413
O       0.60960    0.31567    0.26644
O       0.41977    0.66643    0.30604
O       0.21601    0.08733    0.32243
Ti      0.37619    0.75747    0.31464  
Ti      0.47335    0.56496    0.31522  
O       0.31061    0.89244    0.32806
O       0.51085    0.44688    0.32813
O       0.65776    0.20475    0.33092
O       0.86408    0.78265    0.33054
Ti      0.71271    0.09366    0.34051  
Ti      0.80365    0.90653    0.34166  
O       0.96915    0.56605    0.33568
O       0.75949    0.99854    0.35144
O       0.58903    0.33219    0.38431
O       0.37485    0.76056    0.38409
Ti      0.53592    0.42770    0.38904  
Ti      0.63847    0.23825    0.39211  
O       0.47844    0.54636    0.39221
O       0.69648    0.12172    0.39792
O       0.81884    0.87368    0.39982
O       0.02548    0.44772    0.40209
Ti      0.87631    0.75786    0.40150  
Ti      0.96772    0.56827    0.40227  
O       0.13992    0.23351    0.40699
O       0.92251    0.66244    0.40947
O       0.75646    0.99935    0.45296
O       0.53450    0.43017    0.45779
Ti      0.71048    0.09194    0.45928  
Ti      0.80530    0.90048    0.45927  
O       0.64697    0.21852    0.46205
O       0.86154    0.78750    0.46241
O       0.97850    0.54272    0.46667
O       0.19958    0.11409    0.47133
Ti      0.03370    0.43140    0.47405  
Ti      0.13535    0.24079    0.47598  
O       0.30521    0.90088    0.47385
O       0.08604    0.33242    0.48099
H       0.35463    0.76997    0.23214
H       0.36180    0.56710    0.24450
O       0.35095    0.88994    0.18867
H       0.82504    0.41361    0.18497
H       0.58355    0.87402    0.17435
H       0.60791    0.31328    0.19260
H       0.92518    0.25006    0.19449
O       0.66180    0.25789    0.19656
H       0.44317    0.16148    0.18091
H       0.41390    0.07770    0.17571
O       0.28971    0.12270    0.18651
O       0.58154    0.40262    0.19418
O       0.74115    0.00043    0.76270
O       0.93811    0.57937    0.74805
Ti      0.78310    0.91367    0.74096  
Ti      0.69373    0.09896    0.73611  
O       0.83701    0.80353    0.74963
O       0.64716    0.19278    0.74210
O       0.49846    0.47149    0.73807
O       0.29212    0.89536    0.73404
Ti      0.48828    0.57420    0.73261  
Ti      0.34961    0.77408    0.73066  
O       0.19935    0.08735    0.72587
O       0.39040    0.68433    0.73356
O       0.58023    0.33357    0.69396
O       0.78399    0.91267    0.67757
Ti      0.62381    0.24253    0.68536  
Ti      0.52665    0.43504    0.68478  
O       0.68939    0.10756    0.67194
O       0.48915    0.55312    0.67187
O       0.34224    0.79525    0.66908
O       0.13592    0.21735    0.66946
Ti      0.28729    0.90634    0.65949  
Ti      0.19635    0.09347    0.65834  
O       0.03085    0.43395    0.66432
O       0.24051    0.00146    0.64856
O       0.41097    0.66781    0.61569
O       0.62515    0.23944    0.61591
Ti      0.46408    0.57230    0.61096  
Ti      0.36153    0.76175    0.60789  
O       0.52156    0.45364    0.60779
O       0.30352    0.87828    0.60208
O       0.18116    0.12632    0.60018
O       0.97452    0.55228    0.59791
Ti      0.12369    0.24214    0.59850  
Ti      0.03228    0.43173    0.59773  
O       0.86008    0.76649    0.59301
O       0.07749    0.33756    0.59053
O       0.24354    0.00065    0.54704
O       0.46550    0.56983    0.54221
Ti      0.28952    0.90806    0.54072  
Ti      0.19470    0.09952    0.54073  
O       0.35303    0.78148    0.53795
O       0.13846    0.21250    0.53759
O       0.02150    0.45728    0.53333
O       0.80042    0.88591    0.52867
Ti      0.96630    0.56860    0.52595  
Ti      0.86465    0.75921    0.52402  
O       0.69479    0.09912    0.52615
O       0.91396    0.66758    0.51901
H       0.64537    0.23003    0.76786
H       0.63820    0.43290    0.75550
O       0.64905    0.11006    0.81133
H       0.17496    0.58639    0.81503
H       0.41645    0.12598    0.82565
H       0.39209    0.68672    0.80740
H       0.07482    0.74994    0.80551
O       0.33820    0.74211    0.80344
H       0.55683    0.83852    0.81909
H       0.58610    0.92230    0.82429
O       0.71029    0.87730    0.81349
O       0.41846    0.59738    0.80582
EOF
