# Supplementary material for: Hydroxylation of TiO2-B: insights from density functional calculations
Source: Royal Society of Chemistry journal article supplement (doi:10.1039/c0jm00422g), 2010-01-01
Supplement: s001-i_2-d1.xtl [file s001-i_2-d1.xtl]

TITLE s001-I 2-D1
DIMENSION 3
CELL
3.754600  12.297400  31.364000  90.000000  90.000000  90.000000
SYMMETRY  NUMBER 1  LABEL P1

ATOMS
NAME       X          Y          Z     
   H    0.48999    0.83141    0.16917 
   H    0.99050    0.33130    0.16920 
   H    0.50645    0.53630    0.79124 
   H    0.99667    0.03743    0.79108 
   H    0.72948    0.68002    0.13683 
   H    0.23318    0.18043    0.13701 
   H    0.25336    0.68366    0.82387 
   H    0.25062    0.18289    0.82365 
   O    0.00432    0.19594    0.15139 
   O    0.48228    0.66920    0.80933 
   O    0.98398    0.01729    0.75966 
   O    0.51794    0.51717    0.75979 
   O    0.99112    0.71983    0.74722 
   O    0.51143    0.21977    0.74713 
   O    0.01180    0.34849    0.74552 
   O    0.49063    0.84858    0.74553 
  Ti    0.99114    0.87745    0.73413 
  Ti    0.51131    0.37734    0.73412 
  Ti    0.00840    0.18543    0.74706 
  Ti    0.49422    0.68554    0.74729 
   O    0.01321    0.15210    0.68738 
   O    0.48863    0.65209    0.68748 
   O    0.99128    0.89845    0.67893 
   O    0.51022    0.39846    0.67895 
  Ti    0.99611    0.87158    0.62094 
  Ti    0.50498    0.37167    0.62093 
  Ti    0.00617    0.16670    0.63070 
  Ti    0.49523    0.66670    0.63085 
   O    0.99555    0.70822    0.62524 
   O    0.50582    0.20822    0.62519 
   O    0.00513    0.33998    0.61341 
   O    0.49608    0.83994    0.61341 
   O    0.00087    0.02482    0.60839 
   O    0.50045    0.52485    0.60843 
   O    0.00296    0.18366    0.55370 
   O    0.49827    0.68366    0.55367 
   O    0.99780    0.86201    0.55179 
   O    0.50314    0.36200    0.55179 
   O    0.00212    0.49785    0.54040 
   O    0.49876    0.99786    0.54041 
  Ti    0.99932    0.04038    0.53988 
  Ti    0.50161    0.54041    0.53988 
  Ti    0.00282    0.33187    0.53635 
  Ti    0.49796    0.83185    0.53637 
   O    0.00152    0.31923    0.48042 
   O    0.49866    0.81930    0.48043 
   O    0.99860    0.04919    0.47986 
   O    0.50163    0.54921    0.47986 
  Ti    0.99914    0.03669    0.42392 
  Ti    0.50039    0.53671    0.42392 
  Ti    0.00048    0.32822    0.42041 
  Ti    0.49930    0.82823    0.42043 
   O    0.99922    0.87093    0.41997 
   O    0.50047    0.37092    0.41996 
   O    0.00021    0.50686    0.40852 
   O    0.49925    0.00685    0.40853 
   O    0.00001    0.18501    0.40673 
   O    0.49974    0.68503    0.40675 
   O    0.00048    0.34399    0.35209 
   O    0.49948    0.84399    0.35210 
   O    0.99955    0.02891    0.34707 
   O    0.49967    0.52893    0.34708 
   O    0.99991    0.66076    0.33523 
   O    0.50017    0.16074    0.33523 
  Ti    0.00064    0.20223    0.32970 
  Ti    0.50014    0.70224    0.32968 
  Ti    0.99959    0.49744    0.33958 
  Ti    0.49933    0.99740    0.33958 
   O    0.99596    0.46959    0.28166 
   O    0.49691    0.96954    0.28165 
   O    0.00268    0.21625    0.27304 
   O    0.50143    0.71626    0.27304 
  Ti    0.99384    0.18175    0.21335 
  Ti    0.49270    0.68175    0.21332 
  Ti    0.99459    0.48996    0.22647 
  Ti    0.49592    0.98994    0.22647 
   O    0.99511    0.01854    0.21527 
   O    0.49384    0.51855    0.21526 
   O    0.99502    0.64734    0.21350 
   O    0.49640    0.14732    0.21349 
   O    0.98394    0.34992    0.20064 
   O    0.48465    0.84992    0.20062 
   O    0.50142    0.69583    0.15137 
   O    0.02105    0.16866    0.80922 
EOF
