# Supplementary material for: Hydroxylation of TiO2-B: insights from density functional calculations
Source: Royal Society of Chemistry journal article supplement (doi:10.1039/c0jm00422g), 2010-01-01
Supplement: s001-i_2-m1.xtl [file s001-i_2-m1.xtl]

TITLE s001 type-I, 2M-1
DIMENSION 3
CELL
3.754600  12.297400  31.364000  90.000000  90.000000  90.000000
SYMMETRY  NUMBER 1  LABEL P1

ATOMS
NAME       X          Y          Z     
   O    0.00923    0.02224    0.77672 
   O    0.51325    0.52189    0.77699 
   O    0.00836    0.71165    0.76978 
   O    0.51201    0.21175    0.76942 
   O    0.01221    0.34417    0.76767 
   O    0.50810    0.84424    0.76806 
  Ti    0.00773    0.88020    0.75761  
  Ti    0.51203    0.38023    0.75745  
  Ti    0.00773    0.17220    0.76104  
  Ti    0.51230    0.67194    0.76151  
   O    0.00902    0.15919    0.70356 
   O    0.50789    0.65891    0.70398 
   O    0.00717    0.89343    0.70026 
   O    0.50881    0.39387    0.70013 
  Ti    0.00540    0.87489    0.64331  
  Ti    0.50528    0.37506    0.64320  
  Ti    0.00582    0.17034    0.64533  
  Ti    0.50539    0.67024    0.64578  
   O    0.00562    0.70978    0.64271 
   O    0.50584    0.20998    0.64235 
   O    0.00524    0.34357    0.63213 
   O    0.50526    0.84331    0.63232 
   O    0.00508    0.02550    0.62749 
   O    0.50439    0.52571    0.62757 
   O    0.00487    0.18295    0.57396 
   O    0.50492    0.68304    0.57411 
   O    0.00381    0.86366    0.57039 
   O    0.50334    0.36392    0.57034 
   O    0.00303    0.49821    0.55924 
   O    0.50364    0.99797    0.55921 
  Ti    0.00355    0.03821    0.55832  
  Ti    0.50312    0.53848    0.55839  
  Ti    0.00264    0.33217    0.55663  
  Ti    0.50322    0.83191    0.55664  
   O    0.99951    0.31598    0.50047 
   O    0.50058    0.81550    0.50048 
   O    0.00182    0.04937    0.49893 
   O    0.50069    0.54980    0.49897 
  Ti    0.99897    0.03317    0.44277  
  Ti    0.49814    0.53326    0.44283  
  Ti    0.99762    0.32697    0.44106  
  Ti    0.49836    0.82682    0.44109  
   O    0.99859    0.86712    0.44018 
   O    0.49782    0.36728    0.44018 
   O    0.99774    0.50167    0.42905 
   O    0.49846    0.00152    0.42902 
   O    0.99720    0.18237    0.42547 
   O    0.49706    0.68233    0.42539 
   O    0.99701    0.33984    0.37194 
   O    0.49765    0.83979    0.37191 
   O    0.99741    0.02203    0.36732 
   O    0.49695    0.52200    0.36726 
   O    0.99678    0.65557    0.35690 
   O    0.49707    0.15558    0.35691 
  Ti    0.99716    0.19521    0.35389  
  Ti    0.49705    0.69517    0.35386  
  Ti    0.99678    0.49052    0.35628  
  Ti    0.49727    0.99047    0.35633  
   O    0.99586    0.47228    0.29931 
   O    0.49650    0.97217    0.29936 
   O    0.99593    0.20721    0.29574 
   O    0.49547    0.70704    0.29569 
  Ti    0.99204    0.19455    0.23821  
  Ti    0.49182    0.69444    0.23818  
  Ti    0.99592    0.48621    0.24201  
  Ti    0.49650    0.98619    0.24208  
   O    0.99636    0.02243    0.23188 
   O    0.49573    0.52243    0.23178 
   O    0.99574    0.65494    0.22978 
   O    0.49653    0.15493    0.22981 
   O    0.99383    0.34454    0.22259 
   O    0.49376    0.84459    0.22261 
   O    0.51586    0.70133    0.16012 
   O    0.02113    0.19992    0.16035 
   H    0.27010    0.17715    0.15465  
   H    0.76424    0.67945    0.15364  
   H    0.03627    0.27985    0.16600  
   H    0.52985    0.78103    0.16639  
   O    0.49050    0.66417    0.83976 
   O    0.03399    0.16503    0.83934 
   H    0.24448    0.68655    0.84719  
   H    0.28224    0.18691    0.84592  
   H    0.47332    0.58461    0.83327  
   H    0.04884    0.08558    0.83255  
EOF
