# Supplementary material for: Hydroxylation of TiO2-B: insights from density functional calculations
Source: Royal Society of Chemistry journal article supplement (doi:10.1039/c0jm00422g), 2010-01-01
Supplement: s001-i_4-m.xtl [file s001-i_4-m.xtl]

DIMENSION 3
CELL
3.754600  12.297400  31.364000  90.000000  90.000000  90.000000
SYMMETRY  NUMBER 1  LABEL P1

ATOMS
NAME       X          Y          Z     
   O    0.83320    0.91132    0.84602 
   O    0.26863    0.72836    0.13552 
   O    0.51702    0.83200    0.21191 
   O    0.01838    0.33223    0.21190 
   O    0.52944    0.15352    0.22312 
   O    0.02917    0.65375    0.22331 
   O    0.53158    0.51951    0.22326 
   O    0.03215    0.01929    0.22340 
  Ti    0.52418    0.97875    0.22792  
  Ti    0.02409    0.47891    0.22788  
  Ti    0.53253    0.68826    0.23420  
  Ti    0.03263    0.18818    0.23404  
   O    0.53244    0.70518    0.28998 
   O    0.03266    0.20504    0.28984 
   O    0.53329    0.96578    0.28717 
   O    0.03252    0.46592    0.28713 
  Ti    0.53259    0.98160    0.34383  
  Ti    0.03214    0.48162    0.34380  
  Ti    0.53182    0.68649    0.34835  
  Ti    0.03212    0.18658    0.34824  
   O    0.53242    0.14598    0.34861 
   O    0.03211    0.64591    0.34869 
   O    0.53206    0.51240    0.35736 
   O    0.03245    0.01243    0.35738 
   O    0.53217    0.83343    0.36351 
   O    0.03201    0.33343    0.36346 
   O    0.53217    0.67575    0.41639 
   O    0.03235    0.17579    0.41634 
   O    0.53229    0.99420    0.42113 
   O    0.03188    0.49412    0.42120 
   O    0.53187    0.36036    0.43162 
   O    0.03222    0.86041    0.43162 
  Ti    0.53218    0.82233    0.43229  
  Ti    0.03198    0.32232    0.43231  
  Ti    0.53177    0.52587    0.43405  
  Ti    0.03231    0.02592    0.43393  
   O    0.53142    0.54278    0.49018 
   O    0.03230    0.04291    0.49009 
   O    0.53226    0.80789    0.49156 
   O    0.03158    0.30797    0.49160 
  Ti    0.53217    0.82365    0.54773  
  Ti    0.03121    0.32394    0.54777  
  Ti    0.53133    0.53086    0.54955  
  Ti    0.03181    0.03065    0.54939  
   O    0.53202    0.98965    0.55033 
   O    0.03124    0.48982    0.55045 
   O    0.53106    0.35535    0.56168 
   O    0.03218    0.85520    0.56168 
   O    0.53210    0.67497    0.56516 
   O    0.03109    0.17487    0.56517 
   O    0.53134    0.51742    0.61870 
   O    0.03172    0.01716    0.61849 
   O    0.53249    0.83432    0.62341 
   O    0.03055    0.33441    0.62331 
   O    0.53065    0.20122    0.63420 
   O    0.03250    0.70126    0.63445 
  Ti    0.53235    0.66115    0.63795  
  Ti    0.03071    0.16114    0.63724  
  Ti    0.53038    0.36648    0.63381  
  Ti    0.03253    0.86619    0.63367  
   O    0.52821    0.38732    0.69075 
   O    0.03419    0.88740    0.69072 
   O    0.53385    0.64750    0.69583 
   O    0.03004    0.14629    0.69528 
  Ti    0.52953    0.66032    0.75389  
  Ti    0.02652    0.16078    0.75288  
  Ti    0.52721    0.37032    0.74765  
  Ti    0.03493    0.87032    0.74746  
   O    0.53232    0.83739    0.75733 
   O    0.02780    0.33636    0.75689 
   O    0.52878    0.20270    0.75892 
   O    0.03511    0.70379    0.75984 
   O    0.53226    0.51284    0.76993 
   O    0.02033    0.01313    0.77021 
   O    0.51375    0.36219    0.84223 
   O    0.80034    0.22420    0.13585 
   H    1.07022    0.90269    0.85943 
   H    0.74046    0.31952    0.83943 
   H    1.02393    0.22610    0.11918 
   H    0.48726    0.73208    0.11798 
   H    0.87796    0.95902    0.82010 
   H    0.53683    0.43100    0.82536 
   H    0.84478    0.27541    0.16048 
   H    0.32145    0.77660    0.16080 
   H    0.24062    0.26333    0.83302 
   H    0.64971    0.77105    0.83294 
   H    0.09139    0.14632    0.84930 
   H    0.77564    0.64984    0.83829 
   O    0.04269    0.20625    0.82918 
   O    0.56639    0.69349    0.82952 
   H    0.12710    0.58842    0.14884 
   H    0.64285    0.08620    0.14896 
   H    0.28191    0.46946    0.14482 
   H    0.78287   -0.03453    0.14517 
   O    0.56868    0.00780    0.15320 
   O    0.06323    0.50919    0.15315 
EOF
