# Supplementary material for: Hydroxylation of TiO2-B: insights from density functional calculations
Source: Royal Society of Chemistry journal article supplement (doi:10.1039/c0jm00422g), 2010-01-01
Supplement: s001-ii_2-d.xtl [file s001-ii_2-d.xtl]

TITLE s001-II  2-D
DIMENSION 3
CELL
3.754600  12.297400  31.364000  90.000000  90.000000  90.000000
SYMMETRY NUMBER 1
ATOMS
NAME       X          Y          Z     
O        0.511707725   0.952843176   0.199469975
O       -0.003151275   0.452997141   0.199491841
Ti       0.509975355   0.990905789   0.254097019
Ti      -0.001904600   0.490856267   0.254137866
Ti       0.499654009   0.697082534   0.254180377
Ti       0.008212848   0.197114681   0.254126370
O        0.508752551   0.156921964   0.251953544
O       -0.000685370   0.656894767   0.252028238
O        0.499084395   0.525427519   0.266211287
O        0.008996345   0.025498054   0.266130895
O        0.510585413   0.841048423   0.272628961
O       -0.002382130   0.341054924   0.272638300
O        0.497426520   0.684192617   0.323872192
O        0.010488922   0.184216183   0.323836598
O        0.507648252   0.003558163   0.328432838
O        0.000405662   0.503515050   0.328511170
O        0.500830081   0.369416026   0.339871104
O        0.007153044   0.869456910   0.339793227
Ti       0.505145780   0.829482705   0.340423830
Ti       0.002406497   0.329429168   0.340452674
Ti       0.500657441   0.534915893   0.341726687
Ti       0.007438397   0.034912996   0.341671495
O        0.502442407   0.552090385   0.397931543
O        0.006864364   0.051968102   0.397872950
O        0.507873136   0.814857304   0.399644717
O        0.000640032   0.314750974   0.399669431
Ti       0.506136735   0.832135707   0.455852629
Ti       0.002823996   0.332174160   0.455866497
Ti       0.503303347   0.537202621   0.457072923
Ti       0.005376804   0.037040230   0.457028178
O        0.505935650   0.997908229   0.457888418
O        0.003384232   0.497950829   0.457927481
O        0.503338262   0.364110456   0.468729953
O        0.006086000   0.864045792   0.468661980
O        0.505590370   0.682430271   0.473432627
O        0.004827373   0.182357683   0.473366998
O        0.504355961   0.525419982   0.526303769
O        0.005950501   0.025246222   0.526209927
O        0.506248449   0.843725223   0.531021590
O        0.004344893   0.343664274   0.530931217
O        0.504658088   0.209836381   0.541732451
O        0.006200653   0.709807660   0.541782681
Ti       0.505698701   0.670643360   0.542700602
Ti       0.004659193   0.170587503   0.542521616
Ti       0.504393064   0.375591099   0.543756703
Ti       0.006330236   0.875618619   0.543865589
O        0.505615354   0.393149076   0.599966096
O        0.007756762   0.892668075   0.600073185
O        0.507752181   0.655854164   0.601885300
O        0.005335143   0.155517760   0.601619302
Ti       0.509295936   0.672817185   0.658121253
Ti       0.006020373   0.172923847   0.657813492
Ti       0.508270753   0.378424762   0.659173885
Ti       0.009562323   0.878371319   0.659305352
O        0.508789886   0.838275068   0.660006613
O        0.006562094   0.338494817   0.659732900
O        0.506257020   0.204502793   0.670924821
O        0.009642786   0.704180271   0.671507096
O        0.514408661   0.523657607   0.676009468
O        0.010579629   0.023682553   0.675597674
O        0.502764052   0.366705598   0.727084072
O        0.004888384   0.867129147   0.727186807
O        0.509550269   0.682465615   0.733834819
O        0.004126292   0.182852547   0.733253332
O        0.504532732   0.051249998   0.746933006
O        0.010718909   0.551096155   0.748128967
Ti       0.510529040   0.510660133   0.745731744
Ti       0.006225920   0.011265921   0.745423411
Ti       0.503178904   0.216920602   0.745384693
Ti       0.008996960   0.717457097   0.745817729
O        0.497975582   0.253145896   0.800279671
O        0.005460213   0.756661274   0.800363260
O        0.013067541  -0.021199818   0.804132669
O        0.525357220   0.473430412   0.804186802
O        0.486904854   0.733160064   0.195617110
O        0.021343874   0.233152140   0.195565514
H        0.001881748   0.836598812   0.808993940
H        0.739025272   0.495480719   0.820593120
H        0.501159724   0.333218885   0.808865178
H        0.212996826   0.006508547   0.821632629
H        0.508055693   0.872470644   0.191139950
H        0.277571901   0.709236256   0.178834792
H        0.000805678   0.372649741   0.191103445
H        0.230125209   0.208970300   0.178747948
