# Supplementary material for: Hydroxylation of TiO2-B: insights from density functional calculations
Source: Royal Society of Chemistry journal article supplement (doi:10.1039/c0jm00422g), 2010-01-01
Supplement: s010_2-d1.xtl [file s010_2-d1.xtl]

DIMENSION 3
CELL s010 2-D1
12.297400  6.625000  30.036800  90.000000  90.000000  107.000000
SYMMETRY  NUMBER 1  LABEL P1

ATOMS
NAME       X          Y          Z     
   H    0.12028    0.81631    0.19260  
   H    0.91954    0.42914    0.19665  
   H    0.61966    0.81037    0.79998  
   H    0.41837    0.43774    0.79357  
   O    0.21361    0.33417    0.84656  
   O    0.78561    0.67539    0.84536  
   O    0.14184    0.99853    0.78449  
   O    0.86104    0.00942    0.78570  
   O    0.05712    0.37651    0.78208  
   O    0.94376    0.63061    0.77972  
   O    0.36343    0.31441    0.77970  
   O    0.63574    0.70402    0.77993  
   O    0.25184    0.65536    0.77602  
   O    0.74740    0.34452    0.77766  
   O    0.44234    0.63920    0.71612  
   O    0.55530    0.36928    0.71737  
   O    0.35977    0.99611    0.71718  
   O    0.63523    0.01024    0.71749  
   O    0.23471    0.34255    0.71530  
   O    0.76179    0.65605    0.71707  
   O    0.12950    0.71360    0.71249  
   O    0.86937    0.29054    0.71317  
   O    0.36261    0.29670    0.65245  
   O    0.63692    0.70903    0.65310  
   O    0.26061    0.65487    0.65231  
   O    0.73701    0.34832    0.65326  
   O    0.05717    0.37023    0.65006  
   O    0.94062    0.63160    0.65085  
   O    0.13198    0.00853    0.65067  
   O    0.86548    0.99305    0.65201  
   O    0.44264    0.63445    0.58982  
   O    0.55687    0.37035    0.59029  
   O    0.36619    0.99614    0.58986  
   O    0.63298    0.00761    0.59029  
   O    0.23783    0.35125    0.58952  
   O    0.76199    0.65303    0.59037  
   O    0.13814    0.70940    0.58820  
   O    0.86056    0.29355    0.58893  
   O    0.36221    0.29462    0.52714  
   O    0.63766    0.70836    0.52771  
   O    0.26383    0.65500    0.52656  
   O    0.73598    0.34942    0.52719  
   O    0.13332    0.00805    0.52638  
   O    0.86632    0.99578    0.52722  
   O    0.05742    0.37036    0.52656  
   O    0.94227    0.63350    0.52695  
   O    0.44224    0.63303    0.46444  
   O    0.55734    0.36971    0.46493  
   O    0.36639    0.99532    0.46420  
   O    0.63339    0.00741    0.46495  
   O    0.23602    0.34908    0.46431  
   O    0.76370    0.65446    0.46491  
   O    0.13770    0.70861    0.46378  
   O    0.86208    0.29437    0.46437  
   O    0.36059    0.29279    0.40260  
   O    0.63788    0.70759    0.40325  
   O    0.26166    0.65164    0.40119  
   O    0.73769    0.35051    0.40197  
   O    0.13297    0.00674    0.40108  
   O    0.86586    0.99488    0.40165  
   O    0.05664    0.36895    0.40135  
   O    0.94245    0.63319    0.40164  
   O    0.36586    0.99164    0.33987  
   O    0.63205    0.00804    0.34098  
   O    0.44064    0.63053    0.34064  
   O    0.55719    0.36927    0.34124  
   O    0.23711    0.34809    0.33835  
   O    0.76051    0.65365    0.33916  
   O    0.13681    0.70839    0.33854  
   O    0.86260    0.29587    0.33903  
   O    0.36880    0.28749    0.27847  
   O    0.62980    0.71419    0.27909  
   O    0.26165    0.65564    0.27460  
   O    0.73479    0.34176    0.27603  
   O    0.13418    0.01048    0.27445  
   O    0.86048    0.99542    0.27450  
   O    0.05517    0.36958    0.27428  
   O    0.94205    0.63848    0.27533  
   O    0.24709    0.34430    0.21416  
   O    0.75132    0.65578    0.21542  
   O    0.13583    0.70723    0.21203  
   O    0.86294    0.31189    0.21189  
   O    0.44338    0.63103    0.21248  
   O    0.55680    0.37678    0.20947  
   O    0.36075    0.00899    0.20565  
   O    0.64089    0.99928    0.20708  
  Ti    0.19053    0.28776    0.78697  
  Ti    0.80956    0.72417    0.78567  
  Ti    0.10669    0.71290    0.77127  
  Ti    0.89402    0.29807    0.77148  
  Ti    0.39474    0.28251    0.71453  
  Ti    0.60209    0.72249    0.71452  
  Ti    0.30426    0.70876    0.71728  
  Ti    0.69259    0.29695    0.71855  
  Ti    0.19377    0.28878    0.65374  
  Ti    0.80446    0.71328    0.65442  
  Ti    0.09842    0.71803    0.64865  
  Ti    0.89986    0.28489    0.64911  
  Ti    0.39813    0.28747    0.58997  
  Ti    0.60109    0.71644    0.59008  
  Ti    0.30638    0.71569    0.59001  
  Ti    0.69264    0.28799    0.59066  
  Ti    0.19404    0.28766    0.52703  
  Ti    0.80573    0.71631    0.52765  
  Ti    0.10042    0.71616    0.52566  
  Ti    0.89927    0.28805    0.52595  
  Ti    0.39922    0.28757    0.46551  
  Ti    0.60038    0.71549    0.46580  
  Ti    0.30573    0.71592    0.46383  
  Ti    0.69393    0.28711    0.46448  
  Ti    0.19257    0.28709    0.40089  
  Ti    0.80619    0.71417    0.40145  
  Ti    0.10082    0.71544    0.40147  
  Ti    0.89794    0.28592    0.40154  
  Ti    0.39997    0.28329    0.34242  
  Ti    0.59838    0.71747    0.34287  
  Ti    0.30446    0.71190    0.33723  
  Ti    0.69388    0.28822    0.33771  
  Ti    0.19237    0.29674    0.27325  
  Ti    0.80406    0.70851    0.27410  
  Ti    0.10147    0.72262    0.27727  
  Ti    0.89480    0.28204    0.27695  
  Ti    0.39377    0.29696    0.22016  
  Ti    0.60618    0.71376    0.22035  
  Ti    0.30893    0.72318    0.20622  
  Ti    0.69057    0.28857    0.20452  
   H    0.73945    0.53635    0.85637  
   H    0.26620    0.28132    0.86474  
   O    0.28355    0.66995    0.14673  
   O    0.71480    0.33554    0.14500  
   H    0.23395    0.53364    0.13589  
   H    0.76693    0.28457    0.12620  
EOF
