# Supplementary material for: Hydroxylation of TiO2-B: insights from density functional calculations
Source: Royal Society of Chemistry journal article supplement (doi:10.1039/c0jm00422g), 2010-01-01
Supplement: s010_4-x.xtl [file s010_4-x.xtl]

DIMENSION 3
CELL s010 4-X
12.297400  6.625000  30.036800  90.000000  90.000000  107.000000
SYMMETRY  NUMBER 1  LABEL P1

ATOMS
NAME       X          Y          Z     
   O    0.85137    0.20609    0.84329  
   O    0.12345    0.67510    0.84746  
   H    0.77548    0.22946    0.84491  
   H    0.16309    0.55639    0.85149  
   H    0.83720    0.04513    0.84721  
   H    0.17094    0.80607    0.86149  
   O    0.62257    0.67420    0.14410  
   O    0.35160    0.20546    0.14833  
   H    0.12311    0.80808    0.19343  
   H    0.92201    0.45001    0.20008  
   H    0.62329    0.80734    0.79828  
   H    0.42281    0.44935    0.79166  
   O    0.21065    0.36285    0.84502  
   O    0.80454    0.78645    0.84195  
   O    0.14618    0.00576    0.78392  
   O    0.87221    0.99961    0.76920  
   O    0.05806    0.36773    0.77922  
   O    0.94521    0.62807    0.77930  
   O    0.36743    0.31849    0.78057  
   O    0.63788    0.69885    0.77855  
   O    0.25644    0.65377    0.77516  
   O    0.74663    0.35379    0.77726  
   O    0.44237    0.64076    0.71553  
   O    0.55603    0.37205    0.71578  
   O    0.36174    0.00186    0.71745  
   O    0.63597    0.01103    0.71773  
   O    0.23516    0.34151    0.71605  
   O    0.76084    0.65257    0.71476  
   O    0.13149    0.71630    0.71437  
   O    0.86619    0.30489    0.71311  
   O    0.36182    0.29974    0.65258  
   O    0.63614    0.71191    0.65200  
   O    0.26025    0.65476    0.65275  
   O    0.73542    0.34872    0.65222  
   O    0.05641    0.37172    0.65172  
   O    0.94071    0.63485    0.65062  
   O    0.13228    0.00942    0.65138  
   O    0.86451    0.99680    0.65219  
   O    0.44046    0.63459    0.58952  
   O    0.55571    0.37154    0.58973  
   O    0.36428    0.99769    0.59050  
   O    0.63100    0.00763    0.58952  
   O    0.23533    0.34998    0.59000  
   O    0.76124    0.65521    0.58959  
   O    0.13662    0.70901    0.58934  
   O    0.85973    0.29436    0.58888  
   O    0.36005    0.29475    0.52739  
   O    0.63617    0.70864    0.52696  
   O    0.26209    0.65546    0.52726  
   O    0.73428    0.34925    0.52685  
   O    0.13127    0.00705    0.52716  
   O    0.86489    0.99654    0.52671  
   O    0.05580    0.37036    0.52703  
   O    0.94031    0.63298    0.52689  
   O    0.44026    0.63294    0.46468  
   O    0.55574    0.37034    0.46458  
   O    0.36484    0.99651    0.46484  
   O    0.63118    0.00700    0.46448  
   O    0.23423    0.34917    0.46479  
   O    0.76202    0.65543    0.46436  
   O    0.13616    0.70868    0.46467  
   O    0.85996    0.29471    0.46422  
   O    0.35958    0.29434    0.40272  
   O    0.63646    0.70888    0.40228  
   O    0.26107    0.65503    0.40203  
   O    0.73516    0.34981    0.40163  
   O    0.13078    0.00753    0.40214  
   O    0.86409    0.99755    0.40111  
   O    0.05553    0.37144    0.40190  
   O    0.94028    0.63447    0.40206  
   O    0.36427    0.99658    0.33938  
   O    0.63197    0.00923    0.34021  
   O    0.44044    0.63466    0.34091  
   O    0.55617    0.37156    0.33988  
   O    0.23511    0.34850    0.33940  
   O    0.76003    0.65455    0.33885  
   O    0.13586    0.71177    0.33963  
   O    0.86155    0.29953    0.33903  
   O    0.36584    0.30450    0.27851  
   O    0.63120    0.71596    0.27725  
   O    0.26041    0.65227    0.27685  
   O    0.73482    0.34124    0.27557  
   O    0.13559    0.01082    0.27394  
   O    0.86140    0.00149    0.27414  
   O    0.05566    0.37180    0.27581  
   O    0.94204    0.64049    0.27601  
   O    0.24629    0.35344    0.21437  
   O    0.75600    0.65330    0.21641  
   O    0.13760    0.69899    0.21306  
   O    0.86699    0.31835    0.21103  
   O    0.44484    0.62754    0.21239  
   O    0.55764    0.36718    0.21242  
   O    0.37199    0.99910    0.22243  
   O    0.64582    0.00521    0.20769  
  Ti    0.19342    0.29431    0.78200  
  Ti    0.81453    0.72712    0.77927  
  Ti    0.10950    0.71751    0.77567  
  Ti    0.89535    0.29571    0.77272  
  Ti    0.39739    0.28824    0.71411  
  Ti    0.60102    0.72320    0.71307  
  Ti    0.30408    0.71644    0.71684  
  Ti    0.69448    0.29840    0.71800  
  Ti    0.19255    0.28856    0.65342  
  Ti    0.80457    0.71660    0.65256  
  Ti    0.09869    0.71741    0.65122  
  Ti    0.89815    0.28840    0.64997  
  Ti    0.39733    0.28976    0.58983  
  Ti    0.59862    0.71600    0.58902  
  Ti    0.30400    0.71795    0.59031  
  Ti    0.69162    0.28714    0.59022  
  Ti    0.19204    0.28608    0.52738  
  Ti    0.80412    0.71743    0.52692  
  Ti    0.09850    0.71470    0.52703  
  Ti    0.89751    0.28879    0.52627  
  Ti    0.39746    0.28879    0.46533  
  Ti    0.59845    0.71467    0.46460  
  Ti    0.30409    0.71743    0.46469  
  Ti    0.69196    0.28605    0.46427  
  Ti    0.19142    0.28705    0.40143  
  Ti    0.80382    0.71780    0.40128  
  Ti    0.09843    0.71592    0.40261  
  Ti    0.89711    0.28961    0.40179  
  Ti    0.39790    0.28822    0.34161  
  Ti    0.59844    0.71723    0.34039  
  Ti    0.30430    0.71642    0.33907  
  Ti    0.69228    0.28838    0.33817  
  Ti    0.19413    0.29823    0.27365  
  Ti    0.80374    0.71598    0.27472  
  Ti    0.10072    0.72302    0.27855  
  Ti    0.89703    0.28780    0.27750  
  Ti    0.39495    0.29514    0.21890  
  Ti    0.60906    0.71691    0.21595  
  Ti    0.31416    0.72668    0.21235  
  Ti    0.69299    0.29370    0.20959  
   H    0.77552    0.68185    0.86565  
   H    0.28626    0.37762    0.85796  
   O    0.30441    0.78624    0.14966  
   O    0.71007    0.36210    0.14656  
   H    0.27338    0.68246    0.12600  
   H    0.78580    0.37749    0.13363  
   H    0.27609    0.23014    0.14629  
   H    0.66205    0.55534    0.14009  
   H    0.33686    0.04426    0.14445  
   H    0.67018    0.80499    0.13006  
EOF
