# Supplementary material for: Hydroxylation of TiO2-B: insights from density functional calculations
Source: Royal Society of Chemistry journal article supplement (doi:10.1039/c0jm00422g), 2010-01-01
Supplement: s100_1-da.xtl [file s100_1-da.xtl]

TITLE s100 1-Da
DIMENSION 3
CELL
3.754600  6.625000  31.000000  90.000000  90.000000  90.000000
SYMMETRY NUMBER 1
ATOMS
NAME       X          Y          Z    
H        0.751150153   0.209519057   0.185228465
O        0.524691469   0.226904321   0.201061198
H       -0.242082100   0.432198748   0.833446113
O       -0.014640340   0.417384251   0.817686023
O        0.005812636   0.521381150   0.392249975
O        0.006605341   0.698338179   0.315367866
Ti       0.007018313   0.365918748   0.339648209
O        0.007130949   0.119979604   0.362764380
O        0.008932206   0.281446253   0.274955060
Ti       0.006242393   0.846793838   0.376933059
O        0.001604819   0.850037259   0.436635841
O        0.000846785   0.679137789   0.514707748
Ti      -0.000074141   0.010679767   0.488522422
O        0.000517582   0.255407748   0.464953022
O       -0.000218067   0.093228502   0.551830846
Ti       0.002050118   0.529368791   0.452083534
O        0.499680579   0.798871210   0.582120114
O        0.500108335   0.970947094   0.504177289
Ti       0.500855409   0.638424816   0.530333964
O        0.500204091   0.393901177   0.554009029
O        0.501305934   0.556549042   0.466984536
Ti       0.499386459   0.119708385   0.566712169
O        0.505548596   0.575777822   0.248090895
O        0.507946040   0.406053726   0.323591591
Ti       0.505908396   0.742603094   0.299900724
O        0.508401068   0.981392651   0.275426768
O        0.505981397   0.819687660   0.363052748
Ti       0.507180938   0.259406120   0.260056727
O       -0.001454389   0.072205758   0.770550543
O       -0.003458463   0.240909021   0.695039462
Ti      -0.003521989   0.904190375   0.718959228
O       -0.004371578   0.666198226   0.743743261
O       -0.002780055   0.826763928   0.655809039
Ti       0.000236764   0.387550974   0.758558674
O        0.497525156   0.125868932   0.626587188
O        0.496902549   0.948047232   0.703452713
Ti       0.497239430   0.281680365   0.679005727
O        0.496771919   0.527370843   0.655806589
O        0.496257645   0.366158094   0.743595643
Ti       0.497338565   0.800814897   0.641868601
H        0.004344781   0.022970441   0.800487492
H        0.519274307   0.628834113   0.218485527
EOF
