# Supplementary material for: Hydroxylation of TiO2-B: insights from density functional calculations
Source: Royal Society of Chemistry journal article supplement (doi:10.1039/c0jm00422g), 2010-01-01
Supplement: s110_1-d1a.xtl [file s110_1-d1a.xtl]

DIMENSION 3
CELL
6.625000  6.429000  30.000000  90.000000  90.000000  106.238000
SYMMETRY  NUMBER 1  LABEL P1

ATOMS
NAME       X          Y          Z     
   O    0.82379    0.10577    0.39041  
   O    0.69574    0.26425    0.77816  
   O    0.33750    0.45785    0.76282  
  Ti    0.71333    0.57944    0.76518  
   O    0.99404    0.67271    0.75896  
  Ti    0.27526    0.70840    0.73975  
   O    0.61075    0.81417    0.74104  
   O    0.34234    0.02046    0.72911  
  Ti    0.68981    0.10088    0.72034  
   O    0.97719    0.16065    0.71955  
  Ti    0.26177    0.26321    0.71365  
   O    0.62187    0.39204    0.70302  
   O    0.23743    0.57969    0.68738  
   O    0.64823    0.06905    0.65755  
   O    0.28401    0.25123    0.64596  
  Ti    0.64582    0.37660    0.63896  
   O    0.92183    0.48171    0.62834  
  Ti    0.21004    0.53834    0.62265  
   O    0.55661    0.62275    0.62121  
   O    0.28714    0.82849    0.60568  
  Ti    0.63213    0.90969    0.60228  
   O    0.92241    0.96962    0.59850  
  Ti    0.19973    0.07747    0.59133  
   O    0.56060    0.20181    0.58282  
   O    0.19906    0.37971    0.56977  
   O    0.59930    0.88222    0.53812  
   O    0.23173    0.05920    0.52573  
  Ti    0.59788    0.18696    0.51808  
   O    0.87431    0.29604    0.51054  
  Ti    0.16396    0.35216    0.50522  
   O    0.50712    0.43345    0.50160  
   O    0.23809    0.64131    0.48738  
  Ti    0.58118    0.72275    0.48388  
   O    0.87095    0.77888    0.47852  
  Ti    0.14722    0.88790    0.47097  
   O    0.51350    0.01568    0.46332  
   O    0.14604    0.19252    0.45091  
   O    0.54721    0.69592    0.41927  
   O    0.18473    0.87287    0.40619  
  Ti    0.54647    0.99823    0.39774  
  Ti    0.11409    0.16604    0.38676  
   O    0.45922    0.24750    0.38350  
   O    0.18973    0.45309    0.36772  
  Ti    0.53620    0.53742    0.36646  
   O    0.82514    0.59429    0.36053  
  Ti    0.10072    0.69956    0.35006  
   O    0.46204    0.82522    0.34323  
   O    0.10006    0.00671    0.33159  
   O    0.51018    0.49917    0.30184  
   O    0.12627    0.68393    0.28540  
  Ti    0.48799    0.81521    0.27552  
   O    0.77172    0.92025    0.27017  
  Ti    0.05952    0.98118    0.26861  
   O    0.40553    0.05797    0.26030  
   O    0.13793    0.26610    0.24843  
  Ti    0.47546    0.36962    0.24946  
   O    0.75358    0.40425    0.23061  
  Ti    0.03549    0.50445    0.22560  
   O    0.41608    0.62244    0.22604  
   O    0.05265    0.81915    0.21112  
   H    0.81633    0.69393    0.84335  
   O    0.69051    0.64107    0.82446  
   H    0.77132    0.23205    0.80443  
   H    0.97507    0.84647    0.18471  
   O    0.06813    0.45587    0.16602  
   H    0.20512    0.52816    0.15210  
EOF
