# Supplementary material for: Hydroxylation of TiO2-B: insights from density functional calculations
Source: Royal Society of Chemistry journal article supplement (doi:10.1039/c0jm00422g), 2010-01-01
Supplement: s110_2-x.xtl [file s110_2-x.xtl]

DIMENSION 3
CELL S110 2-X
6.625000  6.429000  30.000000  90.000000  90.000000  106.238000
SYMMETRY  NUMBER 1  LABEL P1

ATOMS
NAME       X          Y          Z     
   H    0.92264    0.83142    0.19267  
   O    0.67960    0.23312    0.77976  
   O    0.33851    0.44292    0.76296  
  Ti    0.69368    0.55613    0.76087  
   O    0.97719    0.64345    0.75798  
  Ti    0.26380    0.70263    0.74416  
   O    0.61708    0.79629    0.73629  
   O    0.33728    0.00646    0.72746  
  Ti    0.68347    0.08404    0.71862  
   O    0.97216    0.15487    0.72024  
  Ti    0.25577    0.25622    0.71308  
   O    0.61570    0.37958    0.70299  
   O    0.23666    0.57069    0.68926  
   O    0.64784    0.06442    0.65644  
   O    0.28032    0.24516    0.64621  
  Ti    0.64405    0.37079    0.63797  
   O    0.91941    0.47942    0.62932  
  Ti    0.20981    0.53721    0.62529  
   O    0.55357    0.61673    0.62105  
   O    0.28532    0.82556    0.60674  
  Ti    0.62696    0.90216    0.60111  
   O    0.91817    0.96310    0.59810  
  Ti    0.19480    0.07395    0.59156  
   O    0.55808    0.19956    0.58268  
   O    0.19444    0.37700    0.57085  
   O    0.59362    0.87933    0.53783  
   O    0.22837    0.05727    0.52627  
  Ti    0.59406    0.18452    0.51795  
   O    0.87024    0.29407    0.51077  
  Ti    0.16079    0.35234    0.50675  
   O    0.50260    0.43088    0.50164  
   O    0.23365    0.64008    0.48805  
  Ti    0.57549    0.71828    0.48273  
   O    0.86615    0.77722    0.47902  
  Ti    0.14219    0.88674    0.47172  
   O    0.50821    0.01362    0.46334  
   O    0.14248    0.19171    0.45168  
   O    0.54239    0.69343    0.41897  
   O    0.17764    0.87038    0.40695  
  Ti    0.54259    0.99629    0.39809  
  Ti    0.11020    0.16717    0.38798  
   O    0.45194    0.24459    0.38308  
   O    0.18318    0.45270    0.36815  
  Ti    0.52711    0.53270    0.36441  
   O    0.81838    0.59215    0.36075  
  Ti    0.09304    0.70015    0.35175  
   O    0.45596    0.82414    0.34390  
   O    0.09287    0.00606    0.33249  
   O    0.50431    0.50018    0.30076  
   O    0.12017    0.68628    0.28631  
  Ti    0.48849    0.81657    0.27695  
   O    0.77169    0.92225    0.27017  
  Ti    0.05942    0.98269    0.26980  
   O    0.40047    0.06351    0.26273  
   O    0.12853    0.27031    0.24929  
  Ti    0.47595    0.36543    0.24589  
   O    0.75935    0.41451    0.23221  
  Ti    0.04443    0.51236    0.22953  
   O    0.40810    0.63523    0.22805  
   O    0.04540    0.82297    0.21054  
   H    0.79394    0.69167    0.83874  
   O    0.66270    0.63116    0.82182  
   H    0.80499    0.23661    0.79800  
   O    0.09317    0.45946    0.16713  
   H    0.14594    0.59829    0.15099  
   O    0.81932    0.10607    0.39113  
   H    0.44755    0.98483    0.80677  
   O    0.36699    0.82913    0.81121  
   H    0.47756    0.75388    0.82141  
   H    0.51934    0.34320    0.15580  
   O    0.39873    0.28205    0.17569  
   H    0.27794    0.35137    0.16759  
EOF
